# Supplementary material
Source: publisher figshare collection journal article supplement (https://brill.figshare.com/ndownloader/files/16741751)
Supplement: Supplementary file 1 [file 16741751]

**Nuptial feeding and genital coupling of *Neopanorpa* scorpionflies (Insecta: Mecoptera: Panorpidae) with notal organs of various lengths**

*Xin Tong*

Key Laboratory of Plant Protection Resources and Pest Management, Ministry of Education, College of Plant Protection, Northwest A&F University, Yangling, Shaanxi 712100, China

*Bao-Zhen Hua*

Key Laboratory of Plant Protection Resources and Pest Management, Ministry of Education, College of Plant Protection, Northwest A&F University, Yangling, Shaanxi 712100, China

*huabzh@nwafu.edu.cn*

**Supplementary material**

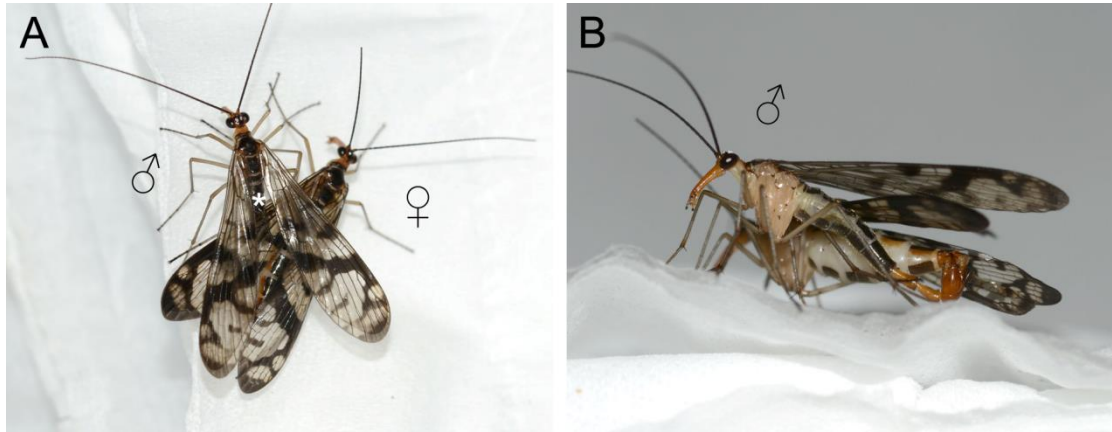

FIGURE S1 Mating process of *Neopanorpa longiprocessa*. a, a male uses the extremely elongated notal organ (\*) to seize the wings of a female; b, the male obtains a coercive mating.

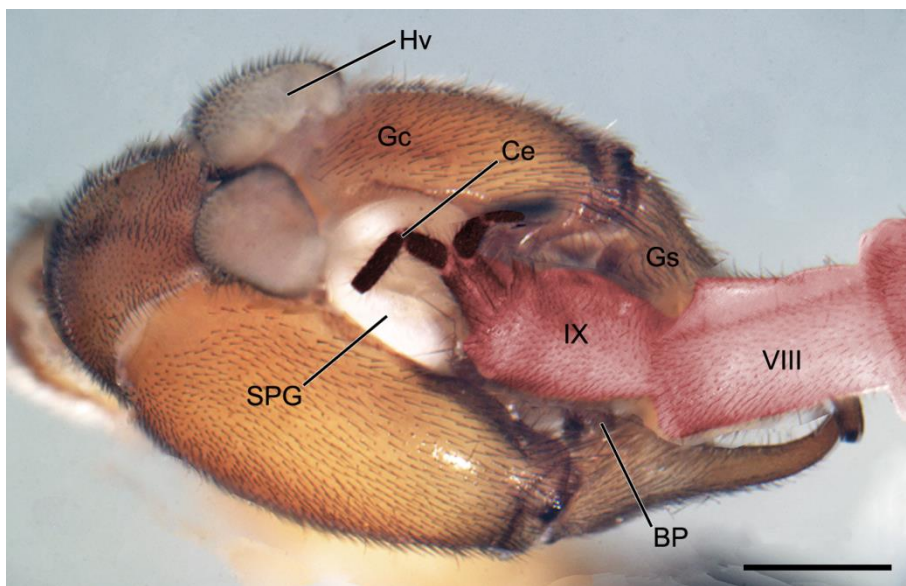

FIGURE S2 Coupling genitalia of *Neopanorpa lui* to show the basal processes grasp the female lateral membranes of the genital segments (the male genital structures are situated on the left, the female on the right; terminal end of female is colored in red). BP, basal process; Ce, cercus; Gc, gonocoxite; Gs, gonostylus; Hv, hypovalve; SPG, sex pheromone glands. Scale bars = 0.5 mm.

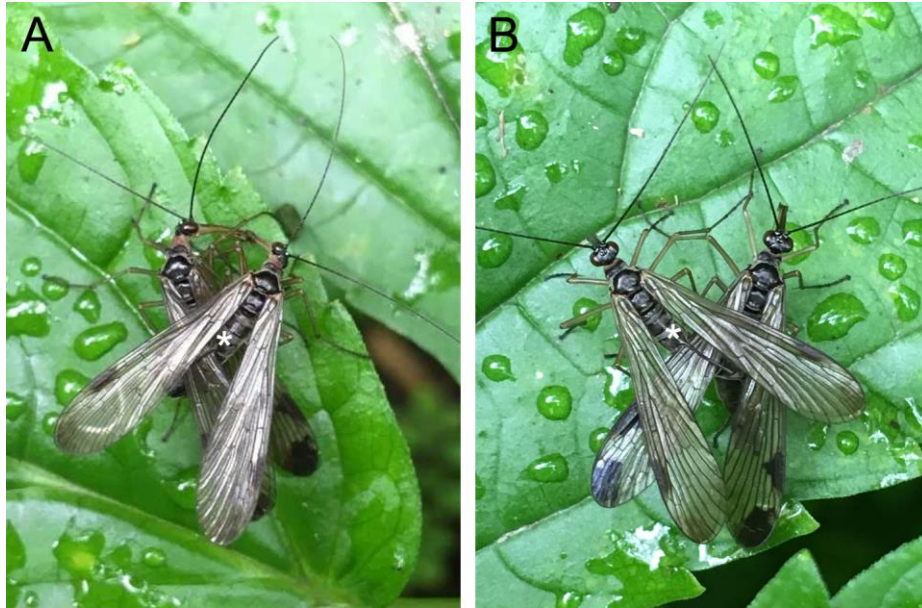

FIGURE S3 Mating process of *Neopanorpa setigera*. a, a male and a female connect their mouthparts to each other to form a mouth-to-mouth mode; b, a male uses the extremely elongated notal organ (\*) to seize the wings of the female and tries to establish a coercive mating (Photo by Gui-Lin Hu).

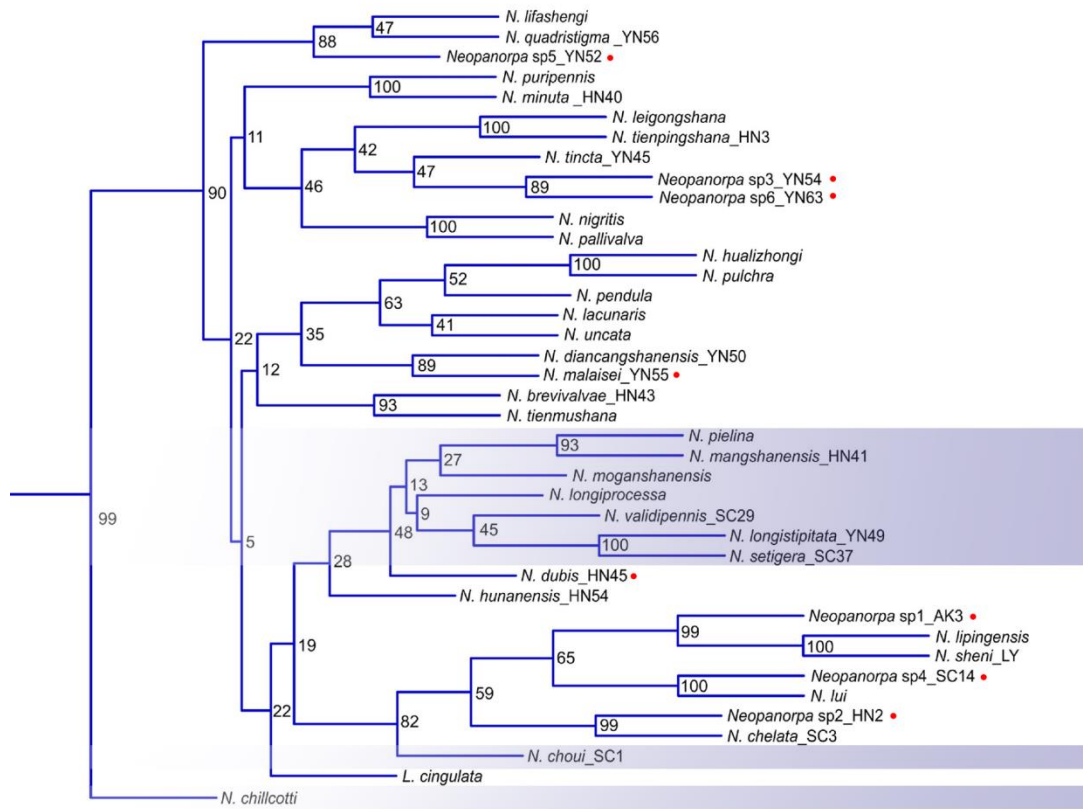

FIGURE S4 An interception of *Neopanorpa* part of the strict consensus tree of Miao et al. (2019) based on combined data of *cox1*, *cox2*, and 28S rRNA. The species with the developed and extremely elongated notal organ are marked in purple. The others species most bear a weakly- or mediumly notal organ. The red dot marks the absence of the information of the length of the notal organ.

TABLE S1 Lengths of the notal organ of 32 species of *Neopanorpa* in the phylogenetic tree of Miao et al. (2019)

| Species                                            | Length                               | Level               | Source/references |
|----------------------------------------------------|--------------------------------------|---------------------|-------------------|
| <i>Neopanorpa brevivalvae</i><br>Chou & Wang, 1988 | Extending to medium portion of A4    | Medium-sized        | Wang & Hua, 2019b |
| <i>N. chelata</i> Carpenter, 1938                  | Extending to medium portion of A4    | Medium-sized        | Wang & Hua, 2019b |
| <i>N. choui</i> Cheng, 1949                        | Extending to medium portion of A8    | Extremely developed | Wang & Hua, 2019b |
| <i>N. chillcotti</i> Byers, 1971                   | Extending to anterior portion of A5  | Developed           | Wang & Hua, 2019b |
| <i>N. diancangshanensis</i><br>Wang & Hua, 2018    | Extending to anterior portion of A4  | Weakly-developed    | Wang & Hua 2018b  |
| <i>N. hualizhong</i> i Hua & Chou, 1998            | Extending to anterior portion of A4  | Weakly-developed    | Wang & Hua, 2019b |
| <i>N. hunanensis</i> Huang & Hua, 2005             | Extending to medium portion of A4    | Medium-sized        | Wang & Hua, 2019b |
| <i>N. lifashengi</i> Hua & Chou, 1999              | Extending to anterior portion of A4  | Weakly-developed    | Wang & Hua, 2019b |
| <i>N. lipingensis</i> Cai & Hua, 2009              | Extending to anterior portion of A4  | Weakly-developed    | Wang & Hua, 2019b |
| <i>N. longiprocessa</i> Hua & Chou, 1997           | Extending to medium portion of A5    | Extremely developed | Wang & Hua, 2019b |
| <i>N. longistipitata</i> Wang & Hua, 2018          | Extending to posterior portion of A6 | Extremely developed | Wang & Hua, 2018b |
| <i>N. lacunaris</i> Navás, 1930                    | Extending to medium portion of A4    | Medium-sized        | Wang & Hua, 2018b |
| <i>N. leigongshana</i> Zhou & Zhou, 2012           | Extending to anterior portion of A4  | Weakly-developed    | Wang & Hua, 2019b |
| <i>N. lui</i> Chou & Ran, 1981                     | Extending to anterior portion of A4  | Weakly-developed    | Wang & Hua, 2019b |
| <i>N. mangshanensis</i> Chou & Wang, 1988          | Extending to anterior portion of A5  | Developed           | Wang & Hua, 2019b |
| <i>N. minuta</i> Chou & Wang, 1988                 | Extending to anterior portion of A4  | Weakly-developed    | Wang & Hua, 2019b |
| <i>N. moganshanensis</i> Zhou & Wu, 1993           | Extending to posterior portion of A6 | Extremely developed | Wang & Hua, 2019b |
| <i>N. nigritis</i> Carpenter, 1938                 | Extending to medium portion of A4    | Medium-sized        | Wang & Hua, 2019b |

TABLE S1 Lengths of the notal organ of 32 species of *Neopanorpa* in the phylogenetic tree of Miao et al. (2019) (*cont.*)

| species                                   | Length                               | Level               | Resource              |
|-------------------------------------------|--------------------------------------|---------------------|-----------------------|
| <i>N. pallivalva</i> Zhou, 2003           | Extending to medium portion of A4    | Medium-sized        | Wang & Hua, 2019b     |
| <i>N. pendula</i> Qian & Zhou, 2001       | Extending to medium portion of A4    | Medium-sized        | Wang & Hua, 2019b     |
| <i>N. pielina</i> Navás, 1936             | Extending to anterior portion of A5  | Developed           | Wang & Hua, 2019b     |
| <i>N. pulchra</i> Carpenter, 1945         | Extending to medium portion of A4    | Medium-sized        | Wang & Hua, 2019b     |
| <i>N. puripennis</i> Chou & Wang, 1988    | Extending to medium portion of A4    | Medium-sized        | Wang & Hua, 2019b     |
| <i>N. quadristigma</i> Wang & Hua, 2018   | Extending to medium portion of A4    | Medium-sized        | Wang & Hua, 2018b     |
| <i>N. setigera</i> Wang & Hua, 2018       | Extending to posterior portion of A6 | Extremely developed | Wang & Hua, 2018a     |
| <i>N. sheni</i> Hua & Chou, 1997          | Extending to anterior portion of A4  | Weakly-developed    | Wang & Hua, 2019b     |
| <i>N. tienmushana</i> Cheng, 1957         | Extending to anterior portion of A4  | Weakly-developed    | Wang & Hua, 2019b     |
| <i>N. tienpingshana</i> Chou & Wang, 1988 | Extending to medium portion of A4    | Medium-sized        | Wang & Hua, 2019b     |
| <i>N. tincta</i> Wang & Hua, 2018         | Extending to medium portion of A4    | Medium-sized        | Wang & Hua, 2018b     |
| <i>N. pallivalva</i> Zhou, 2003           | Extending to medium portion of A4    | Medium-sized        | Wang & Hua, 2019b     |
| <i>N. validipennis</i> Cheng, 1949        | Extending to anterior portion of A5  | Developed           | Cheng, 1949           |
| <i>L. cingulata</i> Byers, 1971           | Extending to medium portion of A4    | Medium-sized        | Specimens observation |
